# Supplementary material for: Structural basis for the neutralization of MERS-CoV by a human monoclonal antibody MERS-27
Source: PubMed Central journal article supplement (PMC4539535; doi:10.1038/srep13133), 2015-08-18

# **Structural basis for the neutralization of MERS-CoV by a human monoclonal antibody MERS-27**

Xiaojuan Yu<sup>1, \*</sup>, Senyan Zhang<sup>1, \*</sup>, Liwei Jiang<sup>2, \*</sup>, Ye Cui<sup>1</sup>, Dongxia Li<sup>3</sup>, Dongli Wang<sup>1</sup>,  
Nianshuang Wang<sup>1</sup>, Lili Fu<sup>2</sup>, Xuanlin Shi<sup>2</sup>, Ziqiang Li<sup>3</sup>, Linqi Zhang<sup>2, #</sup>, Xinquan Wang<sup>1, 4, #</sup>

<sup>1</sup>Ministry of Education Key Laboratory of Protein Science, Center for Structural Biology, School of Life Sciences, Collaborative Innovation Center for Biotherapy, Tsinghua University, Beijing, China

<sup>2</sup>Comprehensive AIDS Research Center, Collaborative Innovation Center for Diagnosis and Treatment of Infectious Diseases, School of Medicine, Tsinghua University, Beijing, China

<sup>3</sup>Beijing VDJBio Co., Ltd, Suite B311, 5 Kaituo Road, Zhongguancun BioMedical Garden, Haidian District, Beijing, China

<sup>4</sup>Collaborative Innovation Center for Biotherapy, State Key Laboratory of Biotherapy and Cancer Center, West China Hospital, West China Medical School, Sichuan University, Chengdu, China

\*Equal contribution

#Corresponding authors

Xinquan Wang: [xinquanwang@mail.tsinghua.edu.cn](mailto:xinquanwang@mail.tsinghua.edu.cn)

Linqi Zhang: [zhanglinqi@mail.tsinghua.edu.cn](mailto:zhanglinqi@mail.tsinghua.edu.cn)

**Figure S1.** Gel filtration profiles and SDS-PAGE gels of purified MERS-CoV RBD, MERS-27 Fab, and the RBD-Fab complex.

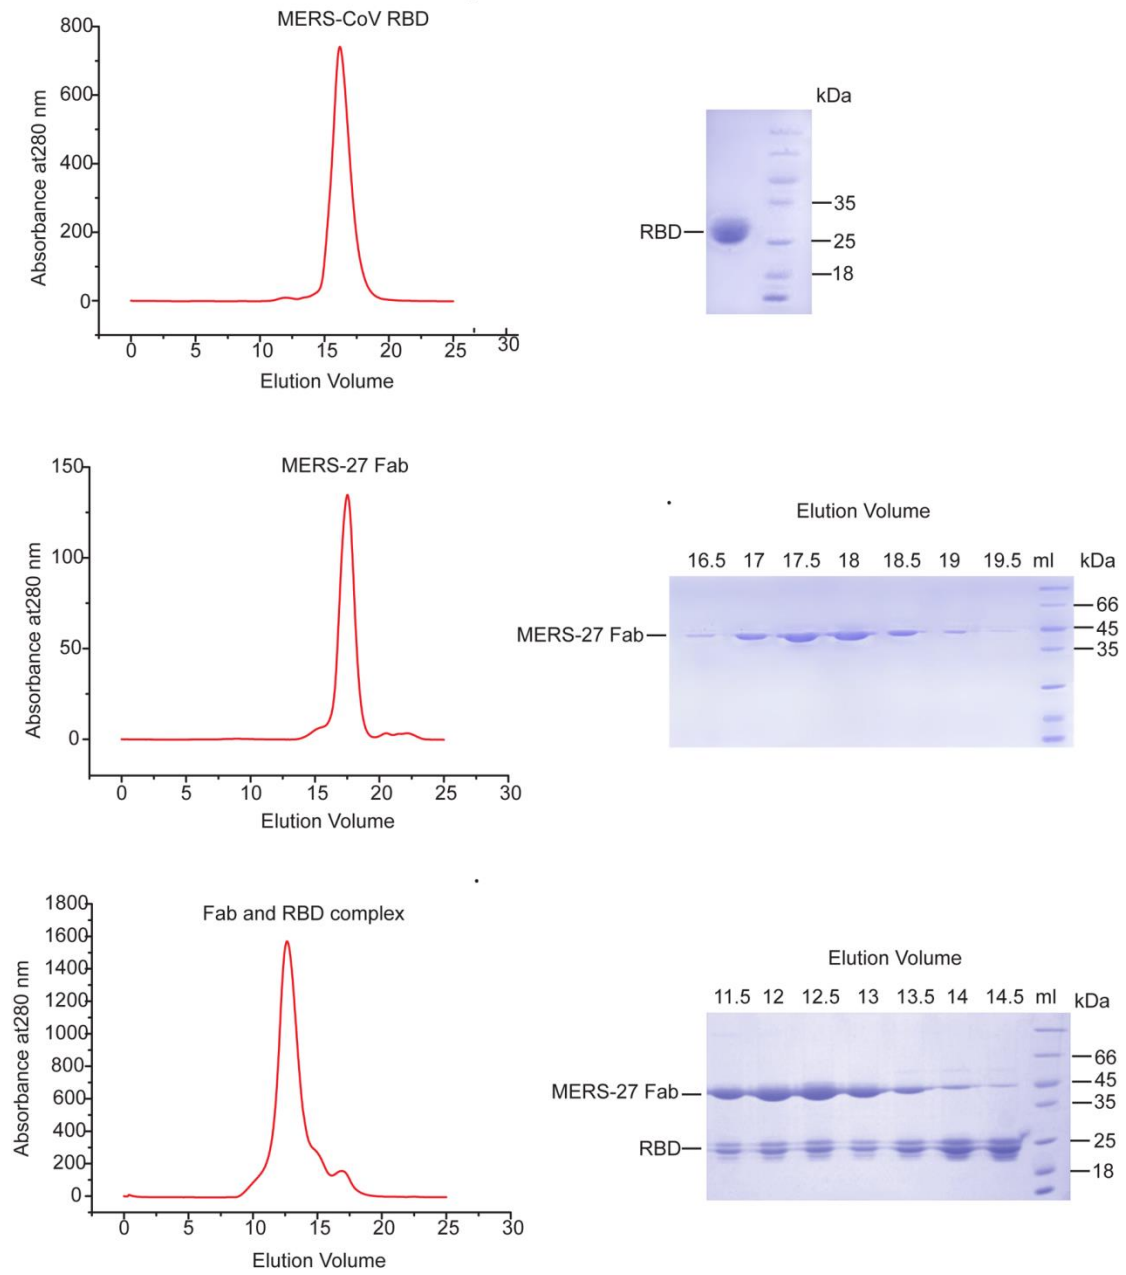

**Figure S2.** Stereo view of the two complexes of MERS-CoV RBD with MERS-27 Fab in the crystallographic asymmetric unit.

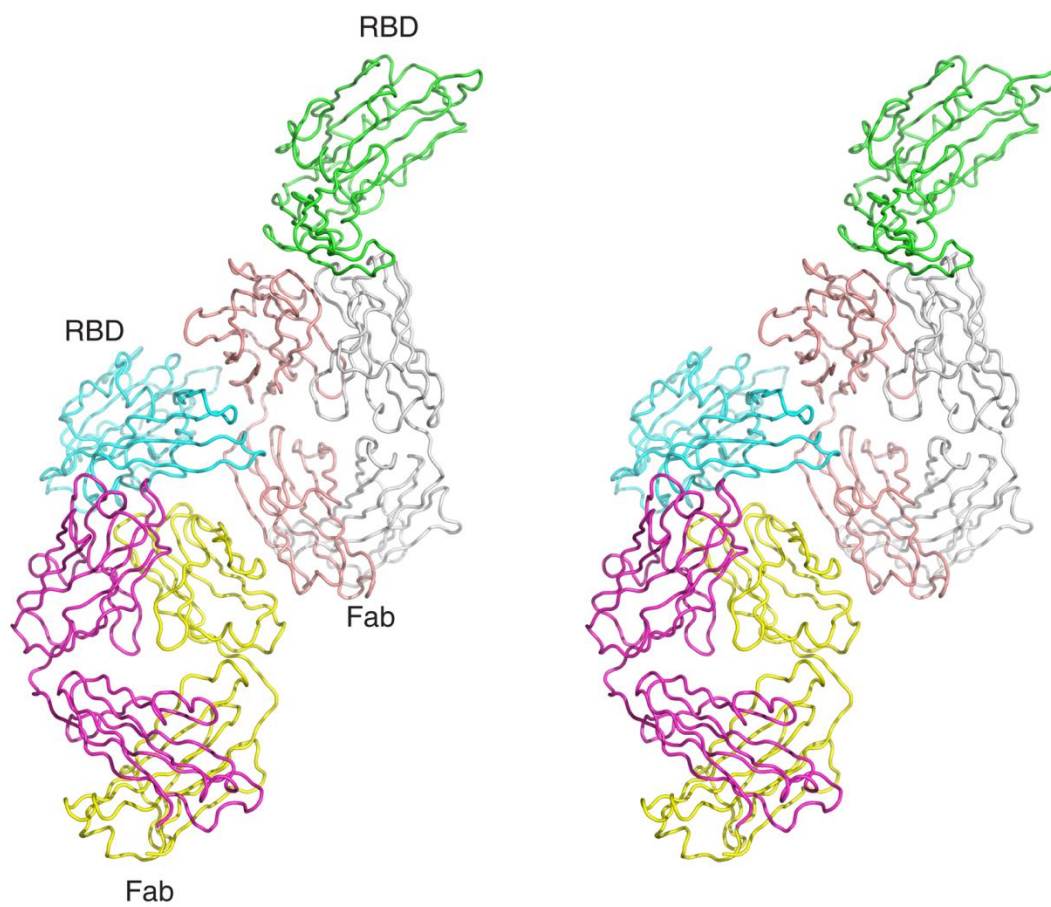

**Figure S3.** Structural superimposition of RBD in unbound (blue), DPP4-bound (orange), and MERS-27-bound (green) states.

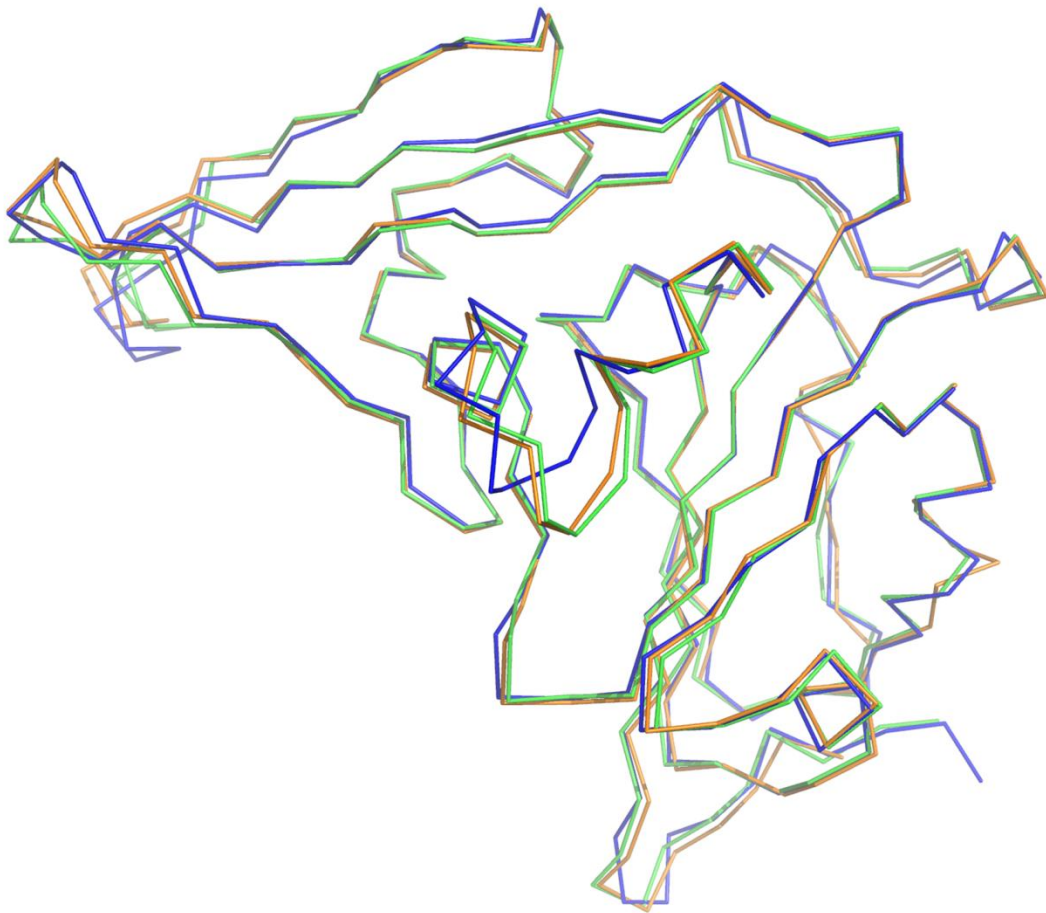

**Figure S4.** The MERS-CoV RBD residue Asp539 forms a hydrogen bond with Tyr33 of heavy chain upon MERS-27 binding (A). This RBD residue forms a salt bridge with Lys267 upon receptor DPP4 binding (B).

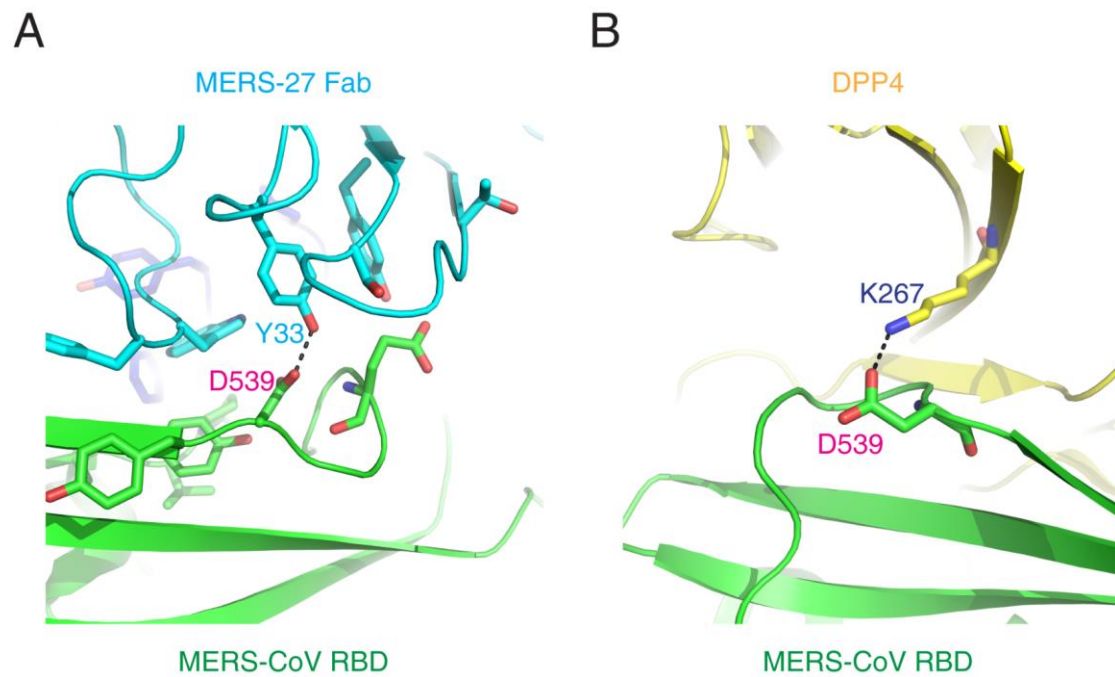

Supplement: srep13133-s1.pdf [file srep13133-s1.pdf]
